RESEARCH ARTICLE

# Tunable Dielectric Properties of Ferrite-Dielectric Based Metamaterial

K. Bi, K. Huang, L. Y. Zeng, M. H. Zhou, Q. M. Wang, Y. G. Wang, M. Lei\*

State Key Laboratory of Information Photonics and Optical Communications & School of Science, Beijing University of Posts and Telecommunications, Beijing 100876, China

\* [minglei@bupt.edu.cn](mailto:minglei@bupt.edu.cn)

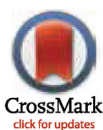

**OPEN ACCESS**

**Citation:** Bi K, Huang K, Zeng LY, Zhou MH, Wang QM, Wang YG, et al. (2015) Tunable Dielectric Properties of Ferrite-Dielectric Based Metamaterial. PLoS ONE 10(5): e0127331. doi:10.1371/journal.pone.0127331

**Academic Editor:** Fuli Zhang, Northwestern Polytechnical University, CHINA

**Received:** March 25, 2015

**Accepted:** April 14, 2015

**Published:** May 20, 2015

**Copyright:** © 2015 Bi et al. This is an open access article distributed under the terms of the [Creative Commons Attribution License](https://creativecommons.org/licenses/by/4.0/), which permits unrestricted use, distribution, and reproduction in any medium, provided the original author and source are credited.

**Data Availability Statement:** All relevant data are within the paper.

**Funding:** This work was supported by the National Natural Science Foundation of China under Grant Nos. 51402163, 61376018, 51032003, 11274198, 51102148 and 51221291; the China Postdoctoral Science Foundation under Grant Nos. 2013M530042 and 2014T70075; and the Fundamental Research Funds for the Central Universities under Grant No. 2015RC18. The funders had no role in study design, data collection and analysis, decision to publish, or preparation of the manuscript.

## Abstract

A ferrite-dielectric metamaterial composed of dielectric and ferrite cuboids has been investigated by experiments and simulations. By interacting with the electromagnetic wave, the Mie resonance can take place in the dielectric cuboids and the ferromagnetic precession will appear in the ferrite cuboids. The magnetic field distributions show the electric Mie resonance of the dielectric cuboids can be influenced by the ferromagnetic precession of ferrite cuboids when a certain magnetic field is applied. The effective permittivity of the metamaterial can be tuned by modifying the applied magnetic field. A good agreement between experimental and simulated results is demonstrated, which confirms that these metamaterials can be used for tunable microwave devices.

## Introduction

Dielectric materials play a very important role in the microwave communication systems because these materials are critical to realization of low-loss temperature-stable resonators and filters for satellite and broadcasting equipments, and many other microwave devices [1–3]. Most of dielectric materials for these devices show a low tunability and one of the easiest ways to improve the tunable property is to find materials where the parameters show magnetic DC bias dependence [4,5]. However, it is a great challenge for those materials to realize the tunable dielectric property in microwave and higher frequency bands [6,7]. The high tunability of their permittivity appears at low frequency region. Hence, dielectric materials with high tunability operating at higher frequency are urgently needed. The high frequency properties of current dielectric materials need to be further improved.

Metamaterials are a class of materials in which subwavelength features, rather than the constituent materials, control the macroscopic electromagnetic properties [8]. The unusual electromagnetic properties of metamaterials originate from the structure rather than being inherited directly from the materials, which opens a way to design material with more freedom [9–12]. Recently, Mie resonance-based metamaterials have been theoretical and experimentally studied [13–17]. Formed from dielectric resonators, dielectric metamaterial unit cells support an electric and magnetic dipole response due to Mie resonances [18]. Proper control of the lattice arrangement, resonator geometry, and composition allows control over the effective

**Competing Interests:** The authors have declared that no competing interests exist.

permittivity and permeability of the metamaterial [19–21]. In previous work, our group experimentally and numerically studied the magnetic Mie resonance of the metamaterial composed of dielectric cubes and ferrite cuboids, and obtained tunable effective permeability and permittivity in magnetic resonance mode [22]. However, the tunability of its permittivity is very low. Similar to the dielectric particles, the dielectric rods can also generate the Mie electromagnetic resonances. Peng *et al.* [23] demonstrated the second Mie resonance mode corresponds to the electric response, and consequently lead to negative permittivity. But, the resonance frequency of such Mie resonance metamaterials can not be tuned. Here, we report a high tunable dielectric property in the ferrite-dielectric metamaterial with electric resonance mode. The simulated and experimental results demonstrate the large effective permittivity of the metamaterial can be tuned by adjusting the applied magnetic field.

### Experimental

The dielectric material chosen for this work was Barium Strontium Titanate (BST) ceramic. Employing the tape casting technique, green tapes were manufactured and sintered at 1400°C to produce BST slabs of thickness 2 mm. These slabs were then cut into cuboids of  $2 \times 2 \times 3 \text{ mm}^3$ . The relative permittivity and dielectric loss are 206 and 0.015, which were measured by using dielectric rod resonator method [24]. The ferrite material chosen for this work was yttrium iron garnet (YIG) ferrite. YIG cuboids were cut to dimensions of  $2 \times 1 \times 3 \text{ mm}^3$ . The saturation magnetization  $4\pi M_s$ , linewidth  $\Delta H$ , and relative permittivity  $\epsilon_r$  of the YIG cuboids were 1950 Gs, 10 Oe, and 14.5, respectively. The ferrite-dielectric metamaterial was fabricated by inserting the dielectric and ferrite cuboids into a Teflon substrate, as shown as an inset in Fig 1. The distance between the dielectric cubes in the  $x$  direction is the same as that in the  $z$  direction (5 mm). The inset shows a photograph of the metamaterial.

Numerical predictions of the transmission spectra were calculated by using the commercial time-domain package CST Microwave Studio TM. The dimension of the unit cell for the metamaterial was  $5 \times 5 \times 5 \text{ mm}^3$ . All the parameters of the dielectric and ferrite cuboids were the same as those in the experiments. A plane wave propagates along  $y$  direction with the electric field along the  $z$  axis and the magnetic field along the  $x$  axis. The bias magnetic field was applied in the  $z$  direction. The microwave properties of the sample were measured by microwave measurement system, which is the same as that in Ref. [22].

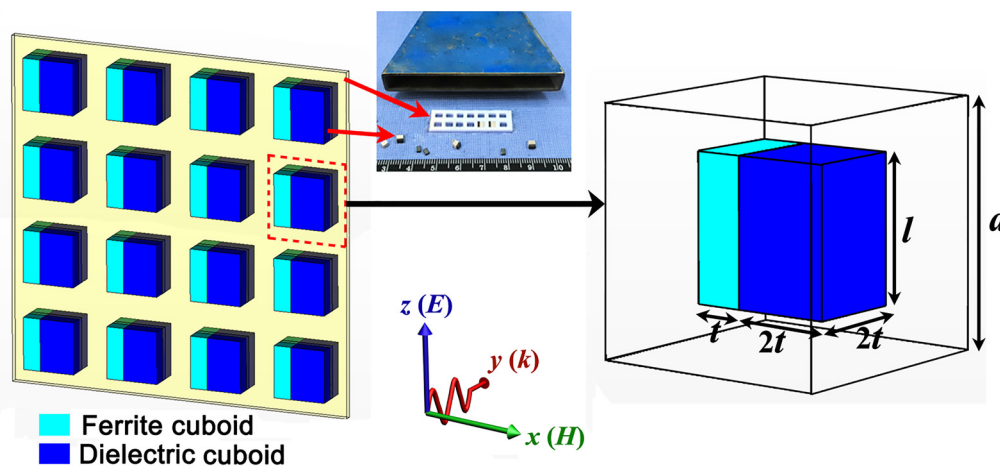

**Fig 1. Schematic diagram of the ferrite-dielectric metamaterial.**

doi:10.1371/journal.pone.0127331.g001

## Results and Discussion

Dielectric cuboid is used to generate electric Mie resonance. The effective permittivity of the standard cylindrical dielectric resonator can be expressed by [25]

$$\epsilon_{\text{eff}}(a) \approx \frac{(R^2 - r^2)}{R^2} [1 + I_e(r, R)], \tag{1}$$

$$I_e(r, R) = \frac{kr\epsilon_1 c_0^{(N)} J_1(k_p r)}{a_0^{(N)} [RH_1^{(1)}(kR) - rH_1^{(1)}(kr)] + RJ_1(kR) - rJ_1(kr)}, \tag{2}$$

$$k = \omega(\epsilon_0 \mu_0)^{1/2}, \tag{3}$$

$$k_p = \sqrt{\mu_1 \epsilon_1} k, \tag{4}$$

where the corresponding coefficients are defined in Ref. [25]. From Eqs (1–4), we observe that the effective permittivity  $\epsilon_{\text{eff}}$  and permeability  $\mu_{\text{eff}}$  can be not only influenced by the permittivity  $\epsilon_2$  and the permeability  $\mu_2$  of the dielectric cylinder, but also affected by the permittivity  $\epsilon_1$  and the permeability  $\mu_1$  of the background matrix. The unit cell of the metamaterial is composed of one dielectric cuboid and one ferrite cuboid. By interacting with the magnetic field of an electromagnetic wave, the ferromagnetic resonance can take place in the ferrite cuboid with applied magnetic field. The equation of the effective permeability for the ferrite under an applied magnetic field can be expressed by [26]

$$\mu_1 = 1 - \frac{F\omega_{\text{mp}}^2}{\omega^2 - \omega_{\text{mp}}^2 - i\Gamma(\omega)\omega}, \tag{5}$$

where  $\Gamma(\omega) = [\omega^2/(\omega_r + \omega_m) + \omega_r + \omega_m]\alpha$ ,  $\omega_{\text{mp}} = (\omega_r(\omega_r + \omega_m))^{1/2}$ ,  $\omega_m = 4\pi M_s \gamma$ ,  $\omega_r = \gamma H$ ,  $\alpha$  is damping coefficient of ferromagnetic precession,  $\gamma$  is the gyromagnetic ratio,  $F = \omega_m/\omega_r$ ,  $\omega_m$  and  $\omega_r$  are characteristic frequency and ferromagnetic resonance frequency of the ferrite,  $M_s$  is the saturation magnetization caused by the applied magnetic field,  $H$  is the applied magnetic field. According to Eq (5), the permeability of the ferrite can be tuned by adjusting the applied magnetic field. Because ferrite is one of the two important parts in this metamaterial, the permittivity of the metamaterial can be affected by the ferromagnetic resonance which can be tuned by applied magnetic field. To simplify fabrication, cuboids rather than cylinders were used as the dielectric materials to prepare the metamaterial.

To clarify the underlying physics of the applied magnetic field dependence of the electromagnetic properties of the metamaterial, the dynamic magnetic field distributions of the unit cell were simulated. Fig 2 shows the magnetic field distributions for the unit cell without or with applied magnetic field. Four maps with different phase (50, 140, 230 and 320 degrees) are chosen to show the dynamic changes of magnetic field distributions. When  $H = 0$ , the ferrite cuboid is not magnetized, and the dielectric cuboid plays a key role in interacting with electromagnetic wave. At the Mie resonance frequency of 11.07 GHz, as shown in Fig 2a, an induced circulation of displacement currents appears in the dielectric cuboid ( $xy$ -plane), which leads to a nonzero electric dipole momentum, resulting in a large electric field along  $z$  axis, demonstrating an electric resonance characteristic. The magnetic field distributions at 11.03 GHz for the unit cell with  $H > 0$  are shown in Fig 2b. It can be seen that the magnetic field distributions at 50 and 230 degrees are much different from that shown in Fig 2a. This is because the ferromagnetic precession takes place in the ferrite cuboid, which could influence the Mie resonance of the dielectric cuboid. On the basis of the analysis of the magnetic field distributions for the unit

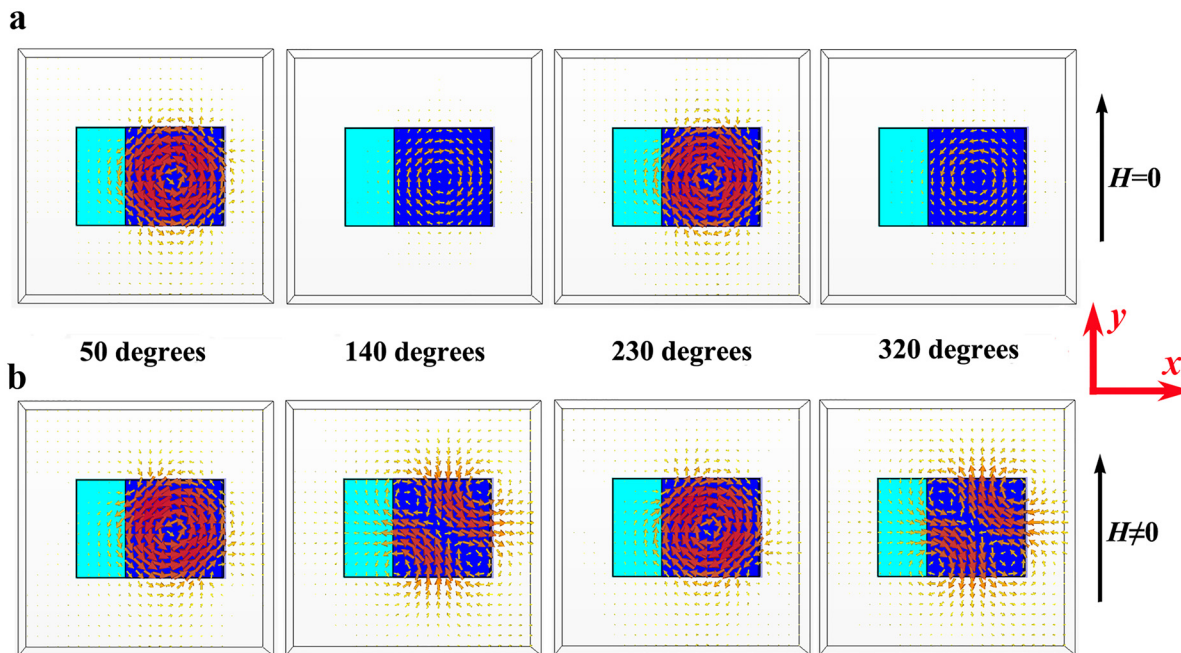

**Fig 2. Magnetic field distributions at Mie resonance frequency for the unit cell (a) without and (b) with applied magnetic field, respectively.** Four maps with different phase (50, 140, 230 and 320 degrees) are chosen to indicate the dynamic changes of magnetic field distributions in the unit cell.

doi:10.1371/journal.pone.0127331.g002

cell without or with applied magnetic field, one can see that the electric Mie resonance can be influenced by the applied magnetic field. Hence, the applied magnetic field can affect the dielectric properties of the metamaterial.

Fig 3a shows the simulated transmission spectra for the unit cell of the metamaterial under a series of applied magnetic fields  $H$ . When  $H = 0$ , it can be seen that only one transmission dip appears at 11.07 GHz. Based on the analysis of magnetic field distributions as shown in Fig 2, the resonance mode corresponds to the electric Mie-resonance. When  $H = 500$  Oe, one can see that two transmission dips appear at 11.03 GHz and 11.18 GHz, respectively. As  $H$  increases from 500 Oe to 2000 Oe, two transmission dips move to higher frequency region and the second transmission dip moves faster than the first one, which exhibits a better magnetically tunable behavior. The effective permittivity of the unit cell under the same series of applied magnetic fields  $H$  was extracted from the simulated scattering parameters [27–29]. Fig 3b shows the dependence of the calculated real part of effective permittivity on frequency. When  $H = 0$ , there is one remarkable dispersion in the range of 10–12 GHz. When  $H > 0$ , instead of one dispersion, two frequency dispersions appear in the range of 10–12 GHz, which also exhibits electric resonance characteristic. In addition, at a certain frequency region, the value of the effective permittivity is negative, which makes this metamaterial suitable for applications in negative refractive index materials. Fig 3c shows the dependence of the calculated imaginary part of effective permittivity on frequency. The imaginary part of the effective permittivity shows a similar behavior. From the above analysis, the effective permittivity of the metamaterial can be tuned by applied magnetic field.

Fig 4a shows the experimental transmission spectra for the metamaterial under a series of applied magnetic fields  $H$ . When  $H = 0$ , a transmission dip is induced by electric Mie-resonance of dielectric cuboid occurs in the transmission spectrum. When  $H > 0$ , two transmission dips appear in the range of 10–12 GHz. The behavior of the resonance frequencies is the same as that shown in Fig 3a, which exhibits a better magnetically tunable behavior. The typical

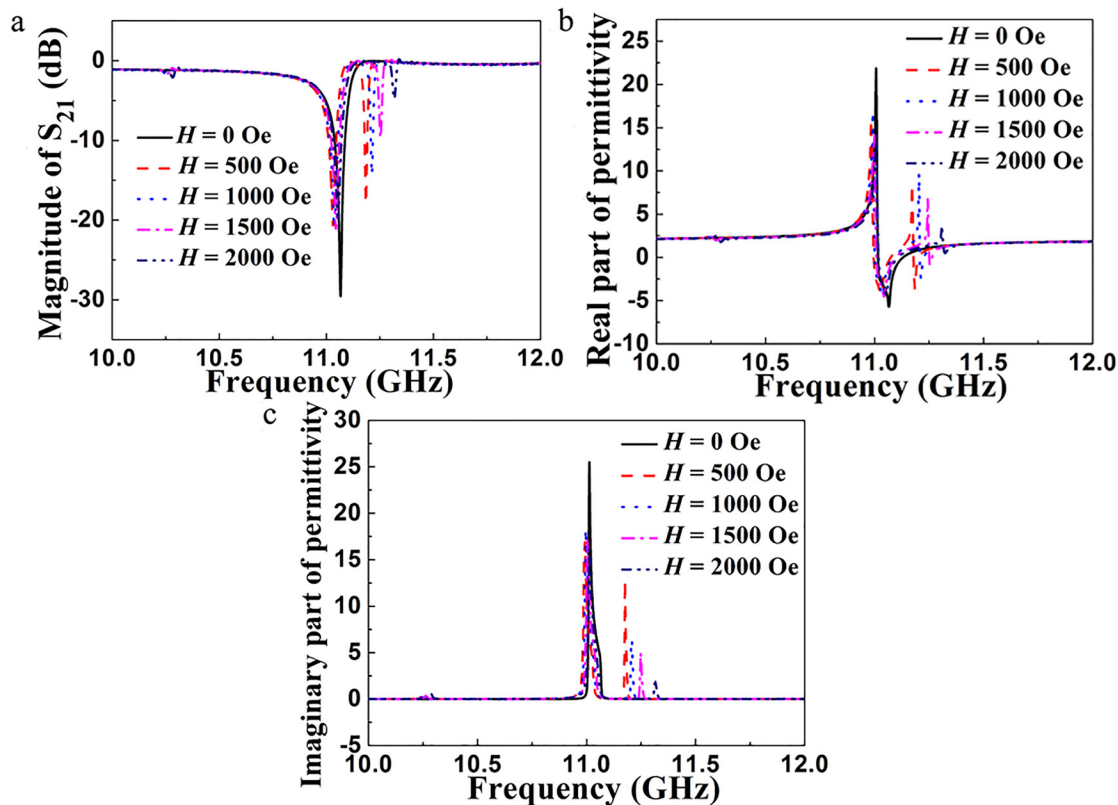

**Fig 3.** (a) Simulated transmission spectra for the unit cell of the metamaterial under a series of applied magnetic fields  $H$ . (b) Real parts and (c) imaginary parts of the effective permittivities retrieved from the simulated scattering parameters under a series of applied magnetic fields  $H$ .

doi:10.1371/journal.pone.0127331.g003

electric Mie-resonance is induced by the dielectric cuboid, which results in one transmission dip appeared in the spectra. By interacting with the electromagnetic wave, the ferromagnetic precession takes place in the ferrite cuboid when  $H > 0$ . Based on Eqs (1–5), the permeability of the ferrite will change, and then the permittivity of the metamaterial will be affected by the ferromagnetic precession which can be tuned by applied magnetic field. As shown in Fig 2b, the electric Mie-resonance in the dielectric cuboid is influenced by the ferromagnetic precession. Hence, two transmission dips appear in the transmission spectra and the resonance frequencies increase as  $H$  increases. The real parts of the effective permittivities retrieved from the experimental scattering parameters under the same series of  $H$  are depicted in Fig 4b. One Lorentz-type dispersion appears in the range of 10–12 GHz when  $H = 0$  Oe. When  $H > 0$ , the second frequency dispersion appears, and the resonance frequency increases as  $H$  increases, which exhibits a magnetically tunable property. In addition, two negative permittivity frequency regions appear in the range of 10–12 GHz, which can be used to prepare dualband negative refractive index metamaterial. Fig 4c shows the magnetic field dependence of the real part of the effective permittivity of the metamaterial at 10.94 GHz. The inset shows the dependence of the imaginary part of permittivity on the applied magnetic field. The real part of the effective permittivity increases until it reaches a maximum (approximately 20.2) at  $H = 500$  Oe and then decreases as  $H$  increases further. The imaginary part of the effective permittivity exhibits a similar behavior, and the value is relative small (8.6 at 10.94 GHz), which indicates the dielectric loss of this metamaterial is low. The magnetic field dependence of the effective permittivity of the metamaterial at 11.23 GHz is shown in Fig 4d. The behavior of the effective permittivity



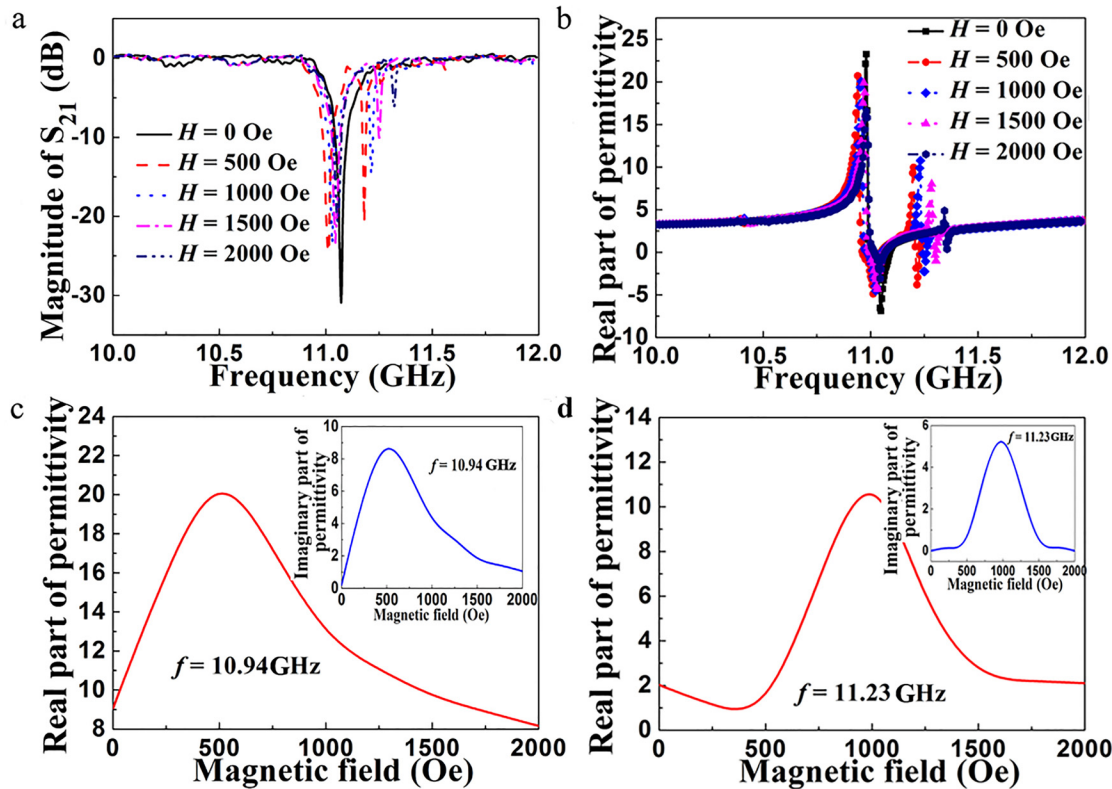

**Fig 4.** (a) Experimental transmission spectra for the metamaterial under a series of applied magnetic fields  $H$ . (b) Real parts of the effective permittivities retrieved from the experimental scattering parameters under a series of applied magnetic fields  $H$ . Magnetic field dependence of the real part of the effective permittivity of the metamaterial at (c) 10.94 GHz and (d) 11.23 GHz. The inset shows the dependence of the imaginary part of permittivity on the applied magnetic field.

doi:10.1371/journal.pone.0127331.g004

at 11.23 GHz is similar with that at 10.94 GHz. From the analysis presented above, it can be seen that the behavior of the experimental results is in good agreement with that of the simulated ones and the magnetically tunable dielectric property is much better than that in previous work (Ref. [22]).

## Conclusion

A ferrite-dielectric metamaterial composed of dielectric and ferrite cuboids has been prepared. When a certain magnetic field is applied, two resonance frequency dispersions appear and two peak values of the effective permittivity are obtained. By adjusting the applied magnetic field, the effective permittivity of the metamaterial can be tuned, which shows a magnetically tunable dielectric property. This work provides a new way to fabricate the tunable dielectric materials and negative refractive index metamaterials, which has greater potential for microwave devices.

## Author Contributions

Conceived and designed the experiments: KB. Performed the experiments: KB ML. Analyzed the data: KH MHZ LYZ. Contributed reagents/materials/analysis tools: YGW QMW. Wrote the paper: KB ML.

## References

1. Colea MW, Joshia PC, Ervina MH, Wooda MC, Pfefferb RL (2000) The influence of Mg doping on the materials properties of  $Ba_{1-x}Sr_xTiO_3$  thin films for tunable device applications. *Thin Solid Films* 374:34–41.
2. Cole MW, Nothwang WD, Hubbard C, Ngo E, Ervin M (2003) Low dielectric loss and enhanced tunability of  $Ba_{0.6}Sr_{0.4}TiO_3$  based thin films via material compositional design and optimized film processing methods. *J. Appl. Phys.* 93: 9218–9225.
3. Kim KT, Kim CI (2002) Structure and dielectrical properties of  $(Pb,Sr)TiO_3$  thin films for tunable microwave device. *Thin Solid Films* 420: 544–547.
4. Somiya Y, Bhalla AS, Cross LE (2001) Study of  $(Sr, Pb)TiO_3$  ceramics on dielectric and physical properties. *Int. J. Inorg. Mater.* 3: 709–714.
5. Stingaciu M, Reuvekamp PG, Tai CW, Kremer RK, Johnsson M (2014) The magnetodielectric effect in  $BaTiO_3$ - $SrFe_{12}O_{19}$  nanocomposites. *J. Mater. Chem. C* 2: 325–330.
6. Castel V, Brosseau C (2008) Magnetic field dependence of the effective permittivity in  $BaTiO_3/Ni$  nanocomposites observed via microwave spectroscopy. *Appl. Phys. Lett.* 92: 233110.
7. Chen Y, Zhang XY, Vittoria C, Harris VG (2009) Giant magnetodielectric effect and magnetic field tunable dielectric resonance in spinel  $MnZn$  ferrite. *Appl. Phys. Lett.* 94: 102906.
8. Smith DR, Pendry JB, Wiltshire MCK (2004) Metamaterials and negative refractive index. *Science* 305: 788–792. PMID: [15297655](#)
9. Bi K, Dong G, Fu X, Zhou J (2013) Ferrite based metamaterials with thermo-tunable negative refractive index. *Appl. Phys. Lett.* 103: 131915.
10. Schurig D, Mock J, Justice B, Cummer S, Pendry J, Strarr A, et al. (2006) Metamaterial electromagnetic cloak at microwave frequencies. *Science* 314: 977–980. PMID: [17053110](#)
11. Chen PY, Farhat M, Alù A (2011) Bistable and Self-Tunable Negative-Index Metamaterial at Optical Frequencies. *Phys. Rev. Lett.* 106: 105503. PMID: [21469804](#)
12. Wu Y, Lai Y, Zhang ZQ (2011) Elastic Metamaterials with Simultaneously Negative Effective Shear Modulus and Mass Density. *Phys. Rev. Lett.* 107: 105506. PMID: [21981513](#)
13. Zhao Q, Zhou J, Zhang FL, Lippens D (2009) Mie resonance-based dielectric metamaterials. *Mater. Today* 12: 60–69.
14. Kang L, Lippens D (2011) Mie resonance based left-handed metamaterial in the visible frequency range. *Phys. Rev. B* 83: 195125.
15. Zhang FL, Huang X, Zhao Q, Chen L, Wang Y, Li Q, et al. (2014) Fano resonance of an asymmetric dielectric wire pair. *Appl. Phys. Lett.* 105:172901.
16. Zhang FL, Zhao Q, Lan CW, He X, Zhang W, Zhou J, et al. (2014) Magnetically coupled electromagnetically induced transparency analogy of dielectric metamaterial. *Appl. Phys. Lett.* 104:131907.
17. Kuznetsov AI, Miroshnichenko AE, Fu YH, Zhang J, Luk'yanchuk B (2012) Magnetic light. *Sci. Rep.* 2: 492. doi: [10.1038/srep00492](#) PMID: [22768382](#)
18. Fu YH, Kuznetsov AI, Miroshnichenko AE, Yu YF, Luk'yanchuk B (2013) Directional visible light scattering by silicon nanoparticles. *Nat. Commun.* 4: 1527. doi: [10.1038/ncomms2538](#) PMID: [23443555](#)
19. Zhang FL, Kang L, Zhao Q, Zhou J, Lippens D (2012) Magnetic and electric coupling effects of dielectric metamaterial. *New J. Phys.* 14: 033031.
20. Zhao Q, Kang L, Du B, Zhao H, Xie Q, Huang X, et al. (2008) Experimental demonstration of isotropic negative permeability in a three-dimensional dielectric composite. *Phys. Rev. Lett.* 101: 027402. PMID: [18764227](#)
21. Zhao Q, Kang L, Du B, Zhao HJ, Xie Q, Li B, et al. (2008) Isotropic negative permeability composite based on Mie resonance of the  $BST$ - $MgO$  dielectric medium. *Chin. Sci. Bull.* 53: 3272–3276.
22. Bi K, Guo YS, Liu XM, Zhao Q, Xiao JH, Lei M, et al. (2014) Magnetically tunable Mie resonance-based dielectric metamaterials. *Sci. Rep.* 4: 7001. doi: [10.1038/srep07001](#) PMID: [25384397](#)
23. Peng L, Ran L, Chen H, Zhang H, Kong JA, Grzegorzczuk TM (2007) Experimental observation of left-handed behavior in an array of standard dielectric resonators. *Phys. Rev. Lett.* 98: 157403. PMID: [17501383](#)
24. Kobayashi Y, Katoh M (1985) Microwave Measurement of Dielectric Properties of Low-Loss Materials by the Dielectric Rod Resonator Method. *IEEE T. Microw. Theory* 33:586–592.
25. Tsang L, Kong JA, Ding KH (2000) *Scattering of Electromagnetic Wave*. Vol. 141.
26. Zhao H, Zhou J, Kang L, Zhao Q (2009) Tunable two-dimensional left-handed material consisting of ferrite rods and metallic wires. *Opt. Express* 17: 13373–13380. PMID: [19654742](#)

27. Smith DR, Schultz S, Markoš P, Soukoulis CM (2002) Determination of effective permittivity and permeability of metamaterials from reflection and transmission coefficients. *Phys. Rev. B* 65: 195104.
28. Croënne C, Fabre B, Gaillot D, Vanbésien O, Lippens D (2008) Bloch impedance in negative index photonic crystals. *Phys. Rev. B* 77: 125333.
29. Chen X, Grzegorzczak TM, Wu B, Pacheco J, Kong JA (2004) Robust method to retrieve the constitutive effective parameters of metamaterials. *Phys. Rev. E* 70: 016608. PMID: [15324190](#)
